# Supplementary figures and images for: Microwave-assisted green synthesis, characterization and adsorption studies on metal oxide nanoparticles synthesized usingFicus Benghalensisplant leaf extracts
Source: Royal Society of Chemistry journal article supplement (doi:10.1039/d0nj01759k), 2020-01-01

**Figure S1:** TEM image of (a)  $\text{Fe}_3\text{O}_4$  (b)  $\text{CeO}_2$  (c)  $\text{ZnO}$  nanoparticles

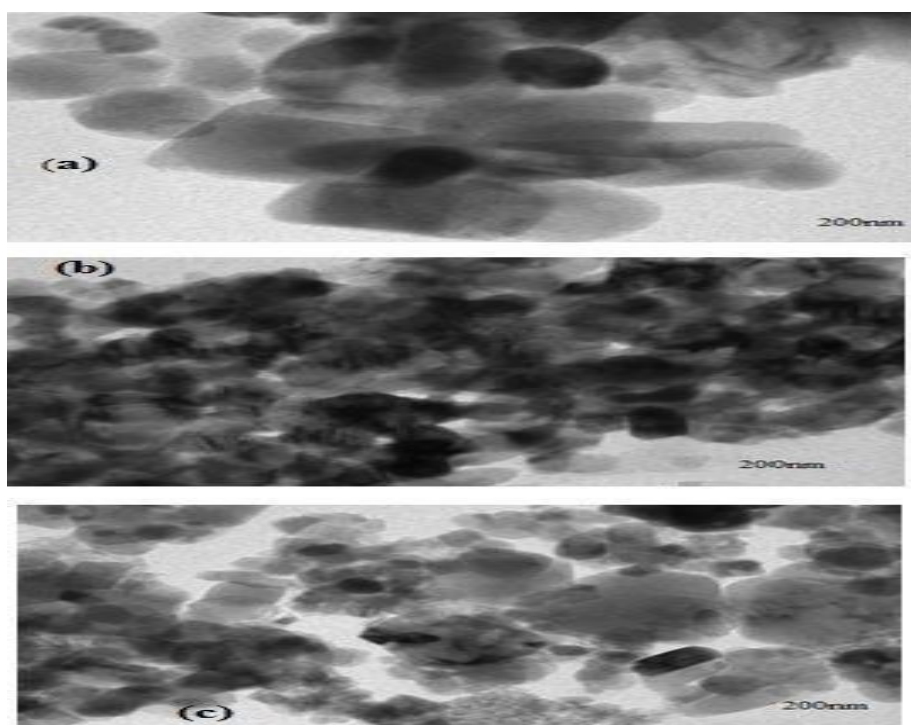

**Figure S1.**

Supplement: d0nj01759k1.pdf [file d0nj01759k1.pdf]
